## RESEARCH ARTICLE

# Posthemorrhagic ventricular dilatation late intervention threshold and associated brain injury

Eva Valverde<sup>1,2,3\*</sup>, Marta Ybarra<sup>1</sup>, Andrea V. Benito<sup>1</sup>, María Carmen Bravo<sup>1,3</sup>, Adelina Pellicer<sup>1,3</sup>

**1** Department of Neonatology, La Paz University Hospital, Madrid, Spain, **2** NeNe Foundation, Madrid, Spain, **3** Hospital La Paz Institute for Health Research-IdiPAZ, Madrid, Spain

\* [evam.valverde@salud.madrid.org](mailto:evam.valverde@salud.madrid.org)

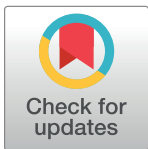

## Abstract

### Objective

To systematically assess white matter injury (WMI) in preterm infants with posthemorrhagic ventricular dilatation (PHVD) using a high-threshold intervention strategy.

### Study design

This retrospective analysis included 85 preterm infants ( $\leq 34$  weeks of gestation) with grade 2–3 germinal matrix-intraventricular hemorrhage. Cranial ultrasound (cUS) scans were assessed for WMI and ventricular width and shape. Forty-eight infants developed PHVD, 21 of whom (intervention group) underwent cerebrospinal fluid drainage according to a pre-defined threshold (ventricular index  $\geq p97+4$  mm or anterior horn width  $>10$  mm, and the presence of frontal horn ballooning). The other 27 infants underwent a conservative approach (non-intervention group). The two PHVD groups were compared regarding ventricular width at two stages: the worst cUS for the non-intervention group (scans showing the largest ventricular measurements) versus pre-intervention cUS in the intervention group, and at term equivalent age. WMI was classified as normal/mild, moderate and severe.

### Results

The intervention group showed significantly larger ventricular index, anterior horn width and thalamo-occipital diameter than the non-intervention group at the two timepoints. Moderate and severe WMI were more frequent in the infants with PHVD ( $p < 0.001$ ), regardless of management (intervention or conservative management). There was a linear relationship between the severity of PHVD and WMI ( $p < 0.001$ ).

### Conclusions

Preterm infants with PHVD who undergo a high-threshold intervention strategy associate an increased risk of WMI.

## OPEN ACCESS

**Citation:** Valverde E, Ybarra M, Benito AV, Bravo MC, Pellicer A (2022) Posthemorrhagic ventricular dilatation late intervention threshold and associated brain injury. PLoS ONE 17(10): e0276446. <https://doi.org/10.1371/journal.pone.0276446>

**Editor:** Emma Duerden, Western University, CANADA

**Received:** March 16, 2022

**Accepted:** October 6, 2022

**Published:** October 27, 2022

**Copyright:** © 2022 Valverde et al. This is an open access article distributed under the terms of the [Creative Commons Attribution License](https://creativecommons.org/licenses/by/4.0/), which permits unrestricted use, distribution, and reproduction in any medium, provided the original author and source are credited.

**Data Availability Statement:** All relevant data are within the paper and its [Supporting information](#) files.

**Funding:** The authors received no specific funding for this work.

**Competing interests:** The authors have declared that no competing interest exist.

## Introduction

The immature preterm brain is at high risk of developing germinal matrix-intraventricular hemorrhage (GMH-IVH) and white matter injury (WMI), conditions that are associated with abnormal brain growth and neurodevelopmental impairment [1]. The prevalence of GMH-IVH among preterm infants (<32 weeks gestation) reaches 25%, and a relevant subset of these infants will experience severe bleeding (7%–18%) [2]. GMH-IVH entails complications such as periventricular hemorrhagic infarction (PVHI), posthemorrhagic ventricular dilatation (PHVD) [2–4], and the need for intervention to remove cerebrospinal fluid, either by using a ventricular reservoir or by ventricular shunt insertion (VSI) [4, 5]. Severe GMH-IVH has been associated with motor and neurocognitive deficits, particularly in infants who develop PHVD requiring VSI [2–4, 6–12]. Brain growth is also significantly impaired in PHVD [13, 14], and the neuropathological consequences of GMH-IVH on white and gray matter and the cerebellum have been established [2, 13–15]. The pathophysiology appears to be related to increased pressure, causing vasospasm, neuroinflammation and secondary periventricular WMI [16–21]. Although the objective of cerebrospinal fluid removal in infants with significant ventricular dilatation is to prevent further damage [22–25], there is still no consensus regarding the timing and type of intervention [4] or on the actual benefit of secondary brain injury prevention. The impact of moderate-severe GMH-IVH on neurodevelopmental outcomes is difficult to characterize, given the heterogeneity of studies on the subject, differences in PHVD management, and the lack of studies documenting the extent of associated parenchymal brain injury with a determinant role on outcomes [26, 27].

The purpose of this retrospective analysis of a cohort of preterm infants below 34 weeks of gestation was to evaluate our routine approach and intervention strategy in PHVD, based on a systematic assessment of the ventricular width and shape, with a high-threshold intervention (as defined by De Vries et al. [5]), with a particular focus on the associated WMI.

## Methods

This review includes all data sets of preterm infants with less than 34 weeks gestation admitted to our level 3 neonatal intensive care unit (NICU), who were diagnosed with grade 2–3 GMH-IVH or PHVD between January 2014 and December 2018. Only inborn (those delivered at the NICU) and outborn (those delivered at another healthcare facility and then transferred to the NICU) infants who had a cranial ultrasound (cUS) study during the first two weeks of birth and subsequent serial studies and, who survived beyond day 10 of life were included in the final analysis. All clinical data were extracted from the medical records. The need for informed consent was waived by the Medical Research Ethics Committee of La Paz University Hospital (Madrid) who approved the study.

### Cranial ultrasound and PHVD intervention protocol

The routine cUS protocol for high-risk preterm infants at our institution includes early (at least two scans during the first week), serial (every 1 or 2 weeks, depending on cUS findings), and term equivalent age (TEA) exams. The images are stored in digital format, allowing for a complete reassessment of brain parenchyma and measurements of several indexes of interest at any time. For the present study, all scans were independently reviewed by two experienced examiners (MY, EV) according to the predefined diagnoses (below). Disagreements were resolved by consensus meetings.

Using parasagittal views, GMH-IVH was classified as grade 2 if the intraventricular bleeding occupied less than 50% of the ventricular width and as grade 3 if more than 50% of the ventricular width was filled by blood and there was acute dilatation of the lateral ventricles [2].

The ventricular width was defined according to three parameters: 1) the ventricular index (VI), defined as the distance between the cerebral falx and the lateral wall of the anterior horn in the coronal plane; 2) the anterior horn width (AHW), defined as the diagonal width of the anterior horn measured at its widest point in the coronal plane; and 3) the thalamo-occipital distance (TOD), defined as the distance between the outermost point of the thalamus at its junction with the choroid plexus and the outermost part of the occipital horn in the parasagittal plane [28]. PHVD was established whenever VI was more than 2 standard deviations (SD) for postmenstrual age [29] or AHW was  $>6$  mm.

The intervention criteria for PHVD was based on ventricular width (VI  $\geq$  p97+4 mm or AHW  $>10$  mm) and the presence of frontal horn ballooning (defined as a change in ventricular shape consisting of a rounding of the frontal horn). Cerebrospinal fluid was removed either by a ventricular reservoir or VSI, depending on whether the patient weighed less than or more than 1500 g. A second intervention was performed to switch from a ventricular reservoir to VSI in infants with persistent ventricular dilatation despite regular cerebrospinal fluid removal. No lumbar punctures were performed, because they are not standard practice in our unit.

WMI was classified according to a modified version of the criteria of Agut et al. [30]. Moderate WMI was defined as periventricular hyperechodensities with heterogeneous appearance, localized cyst formation and/or one or two ultrasound signs of white matter loss at TEA. Severe WMI was defined as periventricular hyperechodensities that progressed into extensive cystic lesions or were followed by more than two signs of white matter loss at TEA. Ultrasound indicators of white matter loss at TEA were established using only the ventricular width criteria: VI  $>13$  mm, AHW  $>3$  mm, or TOD  $>24$  mm. Lastly, white matter was classified as normal if there were no abnormalities (no WMI) or transient periventricular echodensities (mild WMI).

The three ventricular width estimators (VI, AHW, and TOD) employed for the analysis corresponded to the scans obtained at two study timepoints: 1) the last cUS performed prior to the intervention in the patients who underwent cerebrospinal fluid removal (the intervention group) and the scan where these estimators reached their maximum value (worst cUS) in the patients with conservative approach (no cerebrospinal fluid removal), hereinafter referred to as the non-intervention group and 2) the exam conducted at TEA in the intervention and non-intervention groups.

## Statistical analysis

Data were analyzed using SPSS for Windows version 23. The quantitative data are expressed as means and standard deviation or medians and interquartile range (IQR), while the qualitative variables were expressed as absolute values and percentages. When considered, box plots were employed to display the data distribution and dispersion. The Mann-Whitney U or Kruskal-Wallis tests were used to compare the nonparametric variables, and matched samples were compared using Wilcoxon's signed rank test. Fisher's exact and chi-squared tests were employed to compare the categorical variables among the groups. The linear-by-linear test was employed to examine the relationship between two categorical variables. We constructed a multivariate analysis to assess the association between perinatal (multiple pregnancy, restricted intrauterine growth, delivery route, antenatal steroid use, magnesium sulfate administration and antibiotic prescription) and neonatal (sex, gestational age, birth weight, need for advanced resuscitation, cardiovascular support within the first 72 h after birth, patent ductus arteriosus requiring treatment, presence of necrotizing enterocolitis, nosocomial sepsis, use of mechanical ventilation, postnatal steroids, and GMH-IVH parameters) factors as independent variables and the development of PHVD as the dependent variable. Statistical significance was set at  $p < 0.05$ .

## Results

During the study period, 95 infants with less than 34 completed weeks of gestation were admitted with the diagnosis of grade 2–3 GMH-IVH or PHVD, 85 of whom were considered eligible for analysis. Forty-eight of the candidates fulfilled the diagnostic criteria of PHVD, while for the remaining 37, the ventricular width stabilized below the established threshold. The patients' chart flow and exclusion criteria are shown in Fig 1.

The study population's relevant clinical data are shown in Table 1.

The multivariate analysis identified grade 3 GMH-IVH as the only independent risk factor associated with the development of PHVD, after adjusting by gestational age. Considering only the inborn patients (i.e., those who systematically underwent early and serial cUS scans), 43% of those with grade 2–3 GMH-IVH developed PHVD, 92% of them after severe bleeding (grade 3 GMH-IVH).

## PHVD and related interventions

Of the 48 infants with PHVD, 21 underwent cerebrospinal fluid removal (ventricular reservoir,  $n = 18$ ; VSI,  $n = 3$ ) at a median (IQR) age of 17 (12–41) and 31 (19–41) days, for the ventricular reservoir and VSI, respectively. A second intervention to switch from ventricular reservoir to VSI was scheduled for 15 of the 18 infants with a reservoir at a median (IQR) age of 60 (34–78)

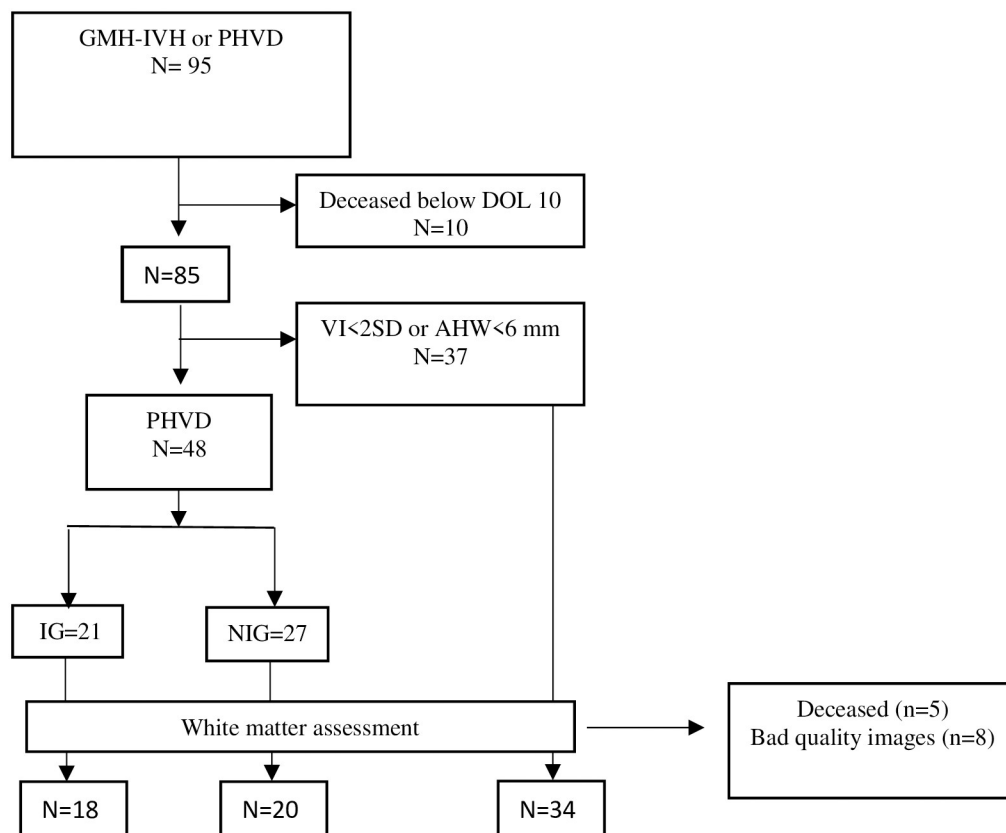

**Fig 1. Flow chart of the study population.** Flowchart of eligible infants ( $n = 95$ ) and excluded infants ( $n = 10$  who died before DOL 10 and  $n = 37$  who had no PHVD threshold criteria). Forty-eight infants with PHVD were included in the final analysis. Abbreviations: GMH-IVH, germinal matrix hemorrhage-intraventricular hemorrhage; DOL, day of life; PHVD, post-hemorrhagic ventricular dilatation; VI, ventricular index; AHW, anterior horn width. IG, intervention group; NG, non-intervention group.

<https://doi.org/10.1371/journal.pone.0276446.g001>

Table 1. Perinatal and neonatal clinical data by study group.

|                                          | No PHVD         | PHVD present    |                        |                           | P                          |                                          |
|------------------------------------------|-----------------|-----------------|------------------------|---------------------------|----------------------------|------------------------------------------|
|                                          | Total<br>N = 37 | Total<br>N = 48 | Intervention<br>N = 21 | No intervention<br>N = 27 | PHVD absent vs.<br>present | PHVD intervention vs. no<br>intervention |
| Mean gestational age, weeks (SD)         | 26.6 (2.6)      | 26.9 (2.2)      | 28 (2.4)               | 25.9 (1.5)                | -                          | 0.0001                                   |
| Mean body weight, g (SD)                 | 951 (341)       | 1036 (308)      | 1160 (310)             | 938 (275)                 | -                          | <0.01                                    |
| Male, n (%)                              | 23 (62)         | 32 (67)         | 14 (67)                | 18 (67)                   | -                          | -                                        |
| Multiple birth, n (%)                    | 12 (32)         | 15 (31)         | 10 (48)                | 5 (18)                    | -                          | -                                        |
| Intrauterine growth restriction, n (%)   | 6 (16)          | 5 (10)          | 3 (14)                 | 2 (7)                     | -                          | -                                        |
| Antenatal steroids, n (%)                | 27 (75)         | 22 (46)         | 10 (48)                | 12 (44)                   | 0.008                      | -                                        |
| Antenatal magnesium sulfate, n (%)       | 24 (67)         | 16 (33)         | 5 (24)                 | 11 (41)                   | 0.004                      | -                                        |
| Caesarean section, n (%)                 | 25 (69)         | 36 (77)         | 18 (90)                | 18 (67)                   | -                          | -                                        |
| Chorioamnionitis, n (%)                  | 19 (53)         | 19 (39)         | 5 (24)                 | 14 (52)                   | -                          | -                                        |
| PDA surgical treatment, n (%)            | 9 (24)          | 8 (16)          | 2 (9.5)                | 6 (22)                    | -                          | -                                        |
| Necrotizing enterocolitis surgery, n (%) | 5 (13)          | 5 (19)          | 2 (9.5)                | 3 (11)                    | -                          | -                                        |
| Nosocomial sepsis, n (%)                 | 23 (62)         | 36 (75)         | 13 (62)                | 23 (85)                   | -                          | -                                        |
| Bronchopulmonary dysplasia, n (%)        | 19 (51)         | 16 (33)         | 7 (33)                 | 9 (33)                    | -                          | -                                        |
| GMH-IVH grade 2, n (%)                   | 30 (81)         | 5 (10)          | 1 (4.8)                | 4 (15)                    | 0.0001                     | -                                        |
| GMH-IVH grade 3, n (%)                   | 7 (19)          | 43 (89)         | 20 (95)                | 23 (85)                   | 0.0001                     | -                                        |
| PVHI, n (%)                              | 5 (13)          | 19 (39)         | 9 (43)                 | 10 (37)                   | 0.004                      | -                                        |
| Exitus between DOL 10 and TEA            | 5               | 6               | 1                      | 5                         | -                          | -                                        |

Quantitative variables are expressed as mean (SD) and categorical values are expressed as n (%). Statistical significance was set at  $p < 0.05$ .

Abbreviations: PDA, patent ductus arteriosus; PHVD, posthemorrhagic ventricular dilatation; GMH-IVH, germinal matrix-intraventricular hemorrhage; PVHI, periventricular hemorrhagic infarction; DOL, day of life; TEA, term equivalent age.

<https://doi.org/10.1371/journal.pone.0276446.t001>

days. The complications were only related to VSI (infection,  $n = 2$ ; need for replacement,  $n = 7$ ).

The results of the ventricular width comparisons by study group are shown in Fig 2. The intervention group had a significantly larger ventricular size than the non-intervention group

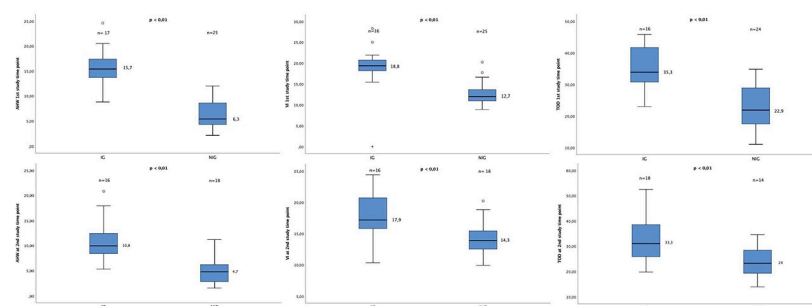

**Fig 2. Ventricular width by study group.** Ventricular measurements (AHW, IV and TOD) at the first study timepoint prior to intervention (IG) compared with the worst cUS (NG) in the upper panel, and at the second study timepoint (TEA) in lower panel. Ventricular size was significantly larger in the IG than in the NG prior to intervention and at TEA. Ventricular values are presented as median  $\pm$  IQR (mm). Abbreviations: AHW, anterior horn width; IV, ventricular index; TOD, thalamo-occipital distance; IG, intervention group; NG, non-intervention group; cUS, cranial ultrasound; TEA, term equivalent age; IQR, interquartile range.

<https://doi.org/10.1371/journal.pone.0276446.g002>

Table 2. White matter abnormalities by study group.

| WMI               | Absent/mild | Moderate | Severe  | Total | P      |
|-------------------|-------------|----------|---------|-------|--------|
| PHVD absent n(%)  | 19 (56)     | 12 (35)  | 3 (9)   | 34    | <0.001 |
| PHVD present n(%) | 5 (13)      | 20 (53)  | 13 (34) | 38    |        |
| PHVD-IG n(%)      | 0 (0)       | 8 (44)   | 10 (56) | 18    | <0.001 |
| PHVD-NG n(%)      | 5 (25)      | 12 (60)  | 3 (15)  | 20    |        |

Linear relationship between severity of the PHVD and the degree of white matter injury using chi-squared linear tendency ( $p < 0.001$ ).

Abbreviations: WMI, white matter injury; PHVD, posthemorrhagic ventricular dilatation; IG, intervention group; NG, non-intervention group.

<https://doi.org/10.1371/journal.pone.0276446.t002>

prior to intervention: VI  $18.8 \pm 5.8$  vs.  $12.7 \pm 2.8$  mm ( $p < 0.001$ ), AHW  $15.7 \pm 3.7$  vs.  $6.3 \pm 2.9$  ( $p < 0.001$ ), TOD  $35.3 \pm 7$  vs.  $22.9 \pm 6.8$  ( $p < 0.001$ ); and at TEA: VI  $18.4 \pm 3.3$  vs.  $14.2 \pm 2.8$  ( $p < 0.01$ ), AHW  $10.9 \pm 4.3$  vs.  $4.6 \pm 2.4$  ( $p < 0.01$ ) and TOD  $33.4 \pm 9.7$  vs.  $22.2 \pm 8.4$  ( $p = 0.01$ ).

### White matter assessment

Thirteen infants were excluded from the study for a white matter appraisal due to early death ( $n = 5$ ) or poor scan quality for assessing brain parenchyma ( $n = 8$ ), resulting in 72 infants who were assessed and classified for white matter abnormalities as normal-mild ( $n = 29$ ), moderate ( $n = 28$ ), or severe ( $n = 15$ ). Eight infants (11%) developed extensive cystic leukomalacia. Among the infants who survived to TEA, 23 (32%) showed signs of white matter loss at TEA (ex-vacuo ventriculomegaly).

WMI was significantly more prevalent among the infants with GMH-IVH who developed PHVD than in those who did not ( $p < 0.001$ ). Considering the subset of infants who developed PHVD, those undergoing neurosurgical procedures (intervention group) showed higher rates of severe WMI than those who did not (non-intervention group) ( $p < 0.001$ ). There was a linear relationship between the PHVD severity and the degree of white matter injury ( $p < 0.001$ ).

Table 2 shows the white matter abnormalities and group comparisons.

### Discussion

This retrospective analysis of a cohort of infants with less than 34 weeks of gestation who experienced grade 2–3 GMH-IVH showed an association between PHVD and the degree of ventricular dilatation and WMI co-occurrence and severity. The multivariate analysis concluded that grade 3 GMH-IVH was the only independent factor related to the development of PHVD, an association that has been scarcely reported [3]. GMH-IVH entails complications such as PVHI and PHVD. The progression of PHVD ranges from spontaneous arrest to progressive ventricular dilatation [3]. In our study, 43% of the infants with grade 2–3 GMH-IVH developed PHVD, most of them (92%) after severe bleeding (grade 3 GMH-IVH), which agrees with previous reports [2, 3, 5, 31]. It is difficult to know a priori the progression of the ventricular dilatation; there is therefore no consensus regarding the type and timing of intervention. If we manage to better define early specific ultrasound parameters for infants with intraventricular hemorrhage and ventricular dilatation that enables us to predict the progression more accurately, with special focus to the brain parenchymal abnormalities associated with PHVD, we will have more information for making decisions as to the timing of intervention.

Our approach was to reassess the WMI at TEA [30], observing a high prevalence of white matter loss, defined as the presence of ventricular enlargement, a feature more frequent in the infants who developed PHVD than in those who did not. White matter loss was particularly frequent and more severe in the infants who met the criteria for neurosurgical intervention. In



fact, 56% of the infants with uncomplicated bleeding who did not develop PHVD had normal/mild WMI compared to 13% of the infants with PHVD (Table 2). While 56% of the infants with more severe ventricular dilatation requiring intervention showed severe WMI, only 15% of the infants with PHVD who did not meet the criteria for intervention (according to our protocol) had that diagnosis. In addition to PVHI and cystic periventricular leukomalacia [32, 33], secondary white and gray matter injury and reduced brain volumes have been documented in infants with PHVD [13, 34, 35]. Focal (non-cystic) and diffuse WMI might be underestimated by cUS and is examiner dependent [36, 37]. High-resolution ultrasound equipment, early and serial cUS, and new classifications for WMI at TEA that include the concept of white matter loss are therefore critical [30, 36–40]. In this study, two experienced examiners evaluated all the available cUS scans, taking into account the progression profile of the white matter echogenicity and the presence of cysts, as well as signs of white matter loss (ex-vacuo ventriculomegaly) in the cUS conducted at TEA, which have shown a good correlation with MRI findings [41, 42].

The ventricular width remained larger in the infants in the intervention group than in the non-intervention group at TEA, regardless of intervention, probably indicating that the intervention could not prevent the ongoing damage to the immature white matter resulting from the presence of blood, increased intraventricular pressure, or both.

Whether the timing of the intervention makes a real difference in outcomes requires further study. There is scarce information on the effect of PHVD on the progression of brain injury and brain growth in the developing brain. In a case-control study, Brouwer et al. [13] evaluated the impact of GMH-IVH and PHVD on brain volumes on TEA-MRI and found that PHVD was independently associated with lower deep gray matter and cerebellar volumes and increased ventricular volumes. In Brouwer's study, white matter volume was not reduced, although the authors observed increased apparent diffusion coefficients in the posterior white matter suggestive of abnormalities in white matter integrity. Our intervention protocol is based on a high-threshold approach ( $VI > p97 + 4$  mm and  $AHW > 10$  mm) (according to de Vries et al. [23]) unlike Brouwer's study where the majority of infants with PHVD received an earlier intervention, starting before the ventricular index crossed the  $p97 + 4$  mm threshold according to Levene's nomogram [29]. Other studies have reported better outcomes with earlier intervention in PHVD [34, 43]. Cizmeci et al. [34], in a nested population of the Early vs. Late Ventricular Intervention Study (ELVIS) that used a structured MRI global brain abnormality score to assess brain injury, showed that infants in the low-threshold group ( $VI > p97$  and  $AHW > 6$  mm) had better outcomes than those in the high-threshold group ( $VI > p97 + 4$  mm and  $AHW > 10$  mm), with 46% of infants with normal/mild scores in the low-threshold group compared to 11% in high-threshold group. The authors also showed statistically significant differences between the groups in myelination delay, thinning of the corpus callosum, and dilatation of the lateral ventricles. In this study, VI and AHW on TEA-MRI revealed smaller ventricles in the low-threshold group compared with the high-threshold group ( $VI$  13.4 vs. 15.9 mm and  $AHW$  6.6 vs. 10.6 mm). Cizmeci's findings on the high-threshold group are similar to those found in our study with an VI of 18.4 and an AHW of 10.9 mm. It therefore appears that the timing of the intervention has a real effect on structural brain injury. Damage to the immature white matter can occur as the consequence of a myriad of factors [16, 18–21, 44, 45]. The benefits of the low-threshold intervention strategy could be related to the earlier wash-out of blood products and free radicals, as well as intraventricular pressure release, potentially decreasing the risk of neuroinflammation [22, 23].

An early intervention in PHVD has also been advocated as a measure to reduce the need for VSI [5, 43]. In a retrospective study, de Vries et al. [5] observed that preterm infants with PHVD receiving a late approach strategy for cerebrospinal fluid removal ( $VI \geq p97 + 4$  mm)

required VSI more frequently and showed higher rates of neurodevelopmental impairment than infants undergoing an early approach ( $VI < p97 + 4$  mm). However, the ELVIS trial [23] found no differences in the need for VSI (19% in the low-threshold and 23% in the high-threshold group). Our VSI rate was 30% of the cases diagnosed as PHVD, which is within the reported range (30–60%) [3, 5, 22, 46]. More studies are needed to determine whether an early intervention with prompt removal of blood products can reduce the need for VSI.

This study has several limitations such as its retrospective nature, the small number of included patients and the loss of data in white matter assessment in 15% of the cohort due to early death or poor quality cUS images. However, the strength of this study is that the study population represents the evolving nature of WMI associated with PHVD in a population of preterm infants in whom a standardized protocol based on high-threshold intervention was employed.

In summary, diffuse WMI eventually leading to white matter loss is a frequent finding in preterm infants with grade 2–3 GMH-IVH who develop PHVD. Consistent with the hypothesis of permanent WMI, many of the infants showed severe ventricular dilatation regardless of cerebrospinal fluid removal through a ventricular reservoir or VSI. Despite a systematic surveillance based on serial ventricular measurements and an intervention plan guided by cUS ventricular index, a significant proportion of the infants in our cohort presented significant ventricular enlargement at TEA, indicating either the co-occurrence of brain injury at the time of bleeding or ongoing damage related to inflammation or pressure. Strategies to prevent severe bleeding and implement earlier intervention protocols would ultimately address the pathophysiology of this process and might reduce the impact of GMH-IVH and PHVD on WMI.

## Supporting information

**S1 File. Study's underlying data set.**  
(SAV)

## Acknowledgments

The authors would like to thank Dr. Jesús Díez for his statistical support.

## Author Contributions

**Conceptualization:** Eva Valverde, Adelina Pellicer.

**Data curation:** Eva Valverde, Marta Ybarra, Andrea V. Benito, María Carmen Bravo, Adelina Pellicer.

**Formal analysis:** Eva Valverde, Marta Ybarra, María Carmen Bravo, Adelina Pellicer.

**Investigation:** Eva Valverde, Marta Ybarra, Andrea V. Benito, María Carmen Bravo, Adelina Pellicer.

**Methodology:** Eva Valverde, Marta Ybarra, Andrea V. Benito, María Carmen Bravo.

**Supervision:** Eva Valverde, Adelina Pellicer.

**Validation:** Eva Valverde, Marta Ybarra, María Carmen Bravo, Adelina Pellicer.

**Writing – original draft:** Eva Valverde, Adelina Pellicer.

**Writing – review & editing:** Eva Valverde, Marta Ybarra, Andrea V. Benito, María Carmen Bravo, Adelina Pellicer.



## References

- Volpe JJ. Brain injury in premature infants: a complex amalgam of destructive and developmental disturbances. *Lancet Neurology* 2009; 8:110–24. [https://doi.org/10.1016/S1474-4422\(08\)70294-1](https://doi.org/10.1016/S1474-4422(08)70294-1) PMID: 19081519
- Inder TE, Perlman JM, Volpe JJ. Preterm intraventricular hemorrhage/posthemorrhagic hydrocephalus. In: Volpe JJ, Inder TE, Darras BT, de Vries LS, du Plessis AJ, Neil JJ, Perlman JM, 6<sup>th</sup> eds. *Neurology of the Newborn*. Elsevier;2017.p.637–98.
- Murphy BP, Inder TE, Rooks V, Taylor GA, Anderson J, Mogridge N, et al. Posthaemorrhagic ventricular dilatation in the premature infant: natural history and predictors of outcome. *Arch Dis Child FN*, 2002; 87:F37–F41. <https://doi.org/10.1136/fn.87.1.f37> PMID: 12091289
- Brouwer AJ, Brouwer MJ, Groenendaal F, Benders MJNL, Whitelaw A, De Vries LS. European perspective on the diagnosis and treatment of posthaemorrhagic ventricular dilatation. *Archives of Disease in Childhood: Fetal and Neonatal Edition* 2012; 97:F50–F55. <https://doi.org/10.1136/adc.2010.207837> PMID: 21628422
- De Vries LS, Liem KD, Van Dijk K, Smit BJ, Sie L, Rademaker KJ, et al. Early versus late treatment of posthaemorrhagic ventricular dilatation: Results of a retrospective study from five neonatal intensive care units in The Netherlands. *Acta Paediatrica* 2002; 91:212–7. <https://doi.org/10.1080/080352502317285234> PMID: 11952011
- Futagi Y, Toribe Y, Ogawa K, Suzuki Y. Neurodevelopmental outcome in children with intraventricular hemorrhage. *Pediatric Neurology* 2006; 34:219–24. <https://doi.org/10.1016/j.pediatrneurol.2005.08.011> PMID: 16504792
- Futagi Y, Suzuki Y, Toribe Y, Nakano H, Morimoto K. Neurodevelopmental outcome in children with posthemorrhagic hydrocephalus. *Pediatric Neurology* 2005; 33:26–32. <https://doi.org/10.1016/j.pediatrneurol.2005.01.008> PMID: 15993320
- Adams-Chapman I, Hansen NI, Stoll BJ, Higgins R. Neurodevelopmental outcome of extremely low birth weight infants with posthemorrhagic hydrocephalus requiring shunt insertion. *Pediatrics* 2008; 121:e1167–e1177 <https://doi.org/10.1542/peds.2007-0423> PMID: 18390958
- Brouwer A, Groenendaal F, Van Haastert I, Rademaker K, Hanlo P, Vries L DE. Neurodevelopmental Outcome of Preterm Infants with Severe Intraventricular Hemorrhage and Therapy for Post-Hemorrhagic Ventricular Dilatation. *J Pediatr* 2008; 152:648–54. <https://doi.org/10.1016/j.jpeds.2007.10.005> PMID: 18410767
- Brouwer AJ, Groenendaal F, Benders MJNL, De Vries LS. Early and late complications of germinal matrix-intraventricular haemorrhage in the preterm infant: What is new? *Neonatology* 2014; 106:296–303. <https://doi.org/10.1159/000365127> PMID: 25171657
- Van Zanten SA, De Haan TR, Ursum J, Van Sonderen L. Neurodevelopmental outcome of post-hemorrhagic ventricular dilatation at 12 and 24 months corrected age with high-threshold therapy. *European Journal of Paediatric Neurology* 2011; 15:487–92. <https://doi.org/10.1016/j.ejpn.2011.04.011> PMID: 21600815
- Srinivasakumar P, Limbrick D, Munro R, Mercer D, Rao R, Inder T, et al. Posthemorrhagic ventricular dilatation-impact on early neurodevelopmental outcome. *American Journal of Perinatology* 2013; 30:207–13. <https://doi.org/10.1055/s-0032-1323581> PMID: 22898993
- Brouwer MJ, De Vries LS, Kersbergen KJ, Van Der Aa NE, Brouwer AJ, Viergever MA, et al. Effects of Posthemorrhagic Ventricular Dilatation in the Preterm Infant on Brain Volumes and White Matter Diffusion Variables at Term-Equivalent Age. *Journal of Pediatrics* 2016; 168:41–49.e1. <https://doi.org/10.1016/j.jpeds.2015.09.083> PMID: 26526364
- Jary S, De Carli A, Ramenghi LA, Whitelaw A. Impaired brain growth and neurodevelopment in preterm infants with posthaemorrhagic ventricular dilatation. *Acta Paediatrica* 2012; 101:743–8. <https://doi.org/10.1111/j.1651-2227.2012.02686.x> PMID: 22452585
- Tam EWY, Miller SP, Studholme C, Chau V, Glidden D, Poskitt KJ, et al. Differential effects of intraventricular hemorrhage and white matter injury on preterm cerebellar growth. *Journal of Pediatrics* 2011; 158:366–71. <https://doi.org/10.1016/j.jpeds.2010.09.005> PMID: 20961562
- Eisenhut M, Choudhury S. In premature newborns intraventricular hemorrhage causes cerebral vasospasm and associated neurodisability via heme-induced inflammasome-mediated interleukin-1 production and nitric oxide depletion. *Frontiers in Neurology* 2017; 8:423. <https://doi.org/10.3389/fneur.2017.00423> PMID: 28868047
- Gram M, Sveinsdottir S, Ruscher K, Hansson SR, Cinthio M, Åkerström B, et al. Hemoglobin induces inflammation after preterm intraventricular hemorrhage by methemoglobin formation. *Journal of Neuroinflammation* 2013; 10:100. <https://doi.org/10.1186/1742-2094-10-100> PMID: 23915174

18. Khwaja O, Volpe JJ. Pathogenesis of cerebral white matter injury of prematurity. *Archives of Disease in Childhood: Fetal and Neonatal Ed.* 2008; 93(2):F153–61 <https://doi.org/10.1136/adc.2006.108837> PMID: 18296574
19. Savman K, Nilsson UA, Blennow M, Kjellmer I, Whitelaw A. Non-protein-bound iron is elevated in cerebrospinal fluid from preterm infants with posthemorrhagic ventricular dilatation. *Pediatric Research* 2001; 49:208–12. <https://doi.org/10.1203/00006450-200102000-00013> PMID: 11158515
20. Ley D, Romantsik O, Vallius S, Sveinsdóttir K, Sveinsdóttir S, Agyemang AA, et al. High Presence of Extracellular Hemoglobin in the Periventricular White Matter Following Preterm Intraventricular Hemorrhage. *Frontiers in Physiology* 2016; 7:330. <https://doi.org/10.3389/fphys.2016.00330> PMID: 27536248
21. Kaiser AM, Whitelaw AGL. Cerebrospinal fluid pressure during post haemorrhagic ventricular dilatation in newborn infants. *Archives of Disease in Childhood* 1985; 60:920–4. <https://doi.org/10.1136/adc.60.10.920> PMID: 3904636
22. Whitelaw A, Jary S, Kmita G, Wroblewska J, Musialik-Swietlinska E, Mander M, et al. Randomized trial of drainage, irrigation and fibrinolytic therapy for premature infants with posthemorrhagic ventricular dilatation: Developmental outcome at 2 years. *Pediatrics* 2010; 125:e852–e858. <https://doi.org/10.1542/peds.2009-1960> PMID: 20211949
23. De Vries LS, Groenendaal F, Liem KD, Heep A, Brouwer AJ, Van 'T Verlaet E, et al. Treatment thresholds for intervention in posthaemorrhagic ventricular dilation: A randomised controlled trial. *Archives of Disease in Childhood: Fetal and Neonatal Edition* 2019; 104:F70–5. <https://doi.org/10.1136/archdischild-2017-314206> PMID: 29440132
24. Whitelaw A, Lee-Kelland R. Repeated lumbar or ventricular punctures in newborns with intraventricular haemorrhage. *Cochrane Database of Systematic Reviews* 2017; 4. CD000216. <https://doi.org/10.1002/14651858.CD000216.pub2> PMID: 28384379
25. Kennedy CR, Ayers S, Campbell MJ, Elbourne D, Hope P, Johnson A. Randomized, controlled trial of acetazolamide and furosemide in posthemorrhagic ventricular dilation in infancy: Follow-up at 1 year. *Pediatrics* 2001; 108:597–607. <https://doi.org/10.1542/peds.108.3.597> PMID: 11533324
26. Cooke RWI. Determinants of major handicap in post-haemorrhagic hydrocephalus. *Archives of Disease in Childhood* 1987; 62:504–6. <https://doi.org/10.1136/adc.62.5.504> PMID: 2955748
27. Cizmeci MN, de Vries LS, Ly LG, van Haastert IC, Groenendaal F, Kelly EN, et al. Periventricular Hemorrhagic Infarction in Very Preterm Infants: Characteristic Sonographic Findings and Association with Neurodevelopmental Outcome at Age 2 Years. *Journal of Pediatrics* 2020; 217:79–85. <https://doi.org/10.1016/j.jpeds.2019.09.081> PMID: 31706634
28. Davies MW, Swaminathan M, Chuang SL, Betheras FR. Reference ranges for the linear dimensions of the intracranial ventricles in preterm neonates. *Arch Dis Child Fetal Neonatal Ed* 2000; 82:F218–F223. <https://doi.org/10.1136/fn.82.3.f218> PMID: 10794790
29. Levene MI. Measurement of the growth of the lateral ventricles in preterm infants with real-time ultrasound. *Archives of Disease in Childhood* 1981; 56:900–4. <https://doi.org/10.1136/adc.56.12.900> PMID: 7332336
30. Agut T, Alarcon A, Cabañas F, Bartocci M, Martinez-Biarge M, Horsch S, et al. Preterm white matter injury: ultrasound diagnosis and classification. *Pediatric Research* 2020; 87:37–49. <https://doi.org/10.1038/s41390-020-0781-1> PMID: 32218534
31. Brouwer AJ, Groenendaal F, Han KS, De Vries LS. Treatment of neonatal progressive ventricular dilatation: A single-centre experience. *Journal of Maternal-Fetal and Neonatal Medicine* 2015; 28:2273–9. <https://doi.org/10.3109/14767058.2013.796167> PMID: 23968309
32. Neil JJ VJ. Encephalopathy of prematurity: Clinical-neurological features, diagnosis, imaging, prognosis, therapy. In: Volpe JJ, Inder TE, Darras BT, de Vries LS, du Plessis AJ, Neil JJ, Perlman JM. In: Volpe JJ. editor. *Neurology of Newborn*. 6th, 2018, p. 425–57.
33. Inder TE, Perlman JM, Volpe JJ. Preterm Intraventricular Hemorrhage/Posthemorrhagic Hydrocephalus. Volpe's *Neurology of the Newborn*, Elsevier; 2017, p. 637–98. <https://doi.org/10.1016/B978-0-323-42876-7.00024-7>
34. Cizmeci MN, Khalili N, Claessens NHP, Groenendaal F, Liem KD, Heep A, et al. Assessment of Brain Injury and Brain Volumes after Posthemorrhagic Ventricular Dilatation: A Nested Substudy of the Randomized Controlled ELVIS Trial. *Journal of Pediatrics* 2019; 208:191–197.e2. <https://doi.org/10.1016/j.jpeds.2018.12.062> PMID: 30878207
35. Jary S, De Carli A, Ramenghi LA, Whitelaw A. Impaired brain growth and neurodevelopment in preterm infants with posthaemorrhagic ventricular dilatation. *Acta Paediatrica* 2012; 101:743–8. <https://doi.org/10.1111/j.1651-2227.2012.02686.x> PMID: 22452585
36. Leijser LM, De Bruine FT, Van Der Grond J, Steggerda SJ, Walther FJ, Van Wezel-Meijler G. Is sequential cranial ultrasound reliable for detection of white matter injury in very preterm infants? *Neuroradiology* 2010; 52:397–406. <https://doi.org/10.1007/s00234-010-0668-7> PMID: 20213135

37. Van Wezel-Meijler G, De Bruïne FT, Stegerdda SJ, Van Den Berg-Huysman A, Zeilemaker S, Leijser LM, et al. Ultrasound detection of white matter injury in very preterm neonates: practical implications. *Developmental Medicine & Child Neurology* 2011; 53:29–34. <https://doi.org/10.1111/j.1469-8749.2011.04060.x> PMID: 21950391
38. Kidokoro H, Neil JJ, Inder TE. New MR imaging assessment tool to define brain abnormalities in very preterm infants at term. *American Journal of Neuroradiology* 2013; 34:2208–14. <https://doi.org/10.3174/ajnr.A3521> PMID: 23620070
39. Woodward LJ, Anderson PJ, Austin NC, Howard K, Inder TE. Neonatal MRI to Predict Neurodevelopmental Outcomes in Preterm Infants. *New England Journal of Medicine* 2006; 355:685–94. <https://doi.org/10.1056/NEJMoa053792> PMID: 16914704
40. Martinez-Biarge M, Groenendaal F, Kersbergen KJ, Benders MJNL, Foti F, Van Haastert IC, et al. Neurodevelopmental Outcomes in Preterm Infants with White Matter Injury Using a New MRI Classification. *Neonatology* 2019; 116:227–35. <https://doi.org/10.1159/000499346> PMID: 31108490
41. Beijst C, Dudink J, Wientjes R, Benavente-Fernandez I, Groenendaal F, Brouwer MJ, et al. Two-dimensional ultrasound measurements vs. magnetic resonance imaging-derived ventricular volume of preterm infants with germinal matrix intraventricular haemorrhage. *Pediatric Radiology* 2020; 50:234–41. <https://doi.org/10.1007/s00247-019-04542-x> PMID: 31691845
42. Maunu J, Parkkola R, Rikalainen H, Lehtonen L, Haataja L, Lapinleimu H. Brain and ventricles in very low birth weight infants at term: A comparison among head circumference, ultrasound, and magnetic resonance imaging. *Pediatrics* 2009; 123:617–26. <https://doi.org/10.1542/peds.2007-3264> PMID: 19171630
43. Leijser LM, Miller SP, Van Wezel-Meijler G, Brouwer AJ, Traubici J, Van Haastert IC, et al. Posthemorrhagic ventricular dilatation in preterm infants When best to intervene? *Neurology* 2018; 90:E698–706. <https://doi.org/10.1212/WNL.0000000000004984> PMID: 29367448
44. Cherian S, Whitelaw A, Thoresen M, Love S. The Pathogenesis of Neonatal Post-hemorrhagic Hydrocephalus. *Brain Pathology* 2006; 14:305–11. <https://doi.org/10.1111/j.1750-3639.2004.tb00069.x> PMID: 15446586
45. Adler I, Batton D, Betz B, Bezinque S, Ecklund K, Junewick J, et al. Mechanisms of injury to white matter adjacent to a large intraventricular hemorrhage in the preterm brain. *Journal of Clinical Ultrasound* 2010; 38(5):254–8. <https://doi.org/10.1002/jcu.20683> PMID: 20232402
46. Brouwer AJ, Groenendaal F, Han KS, De Vries LS. Treatment of neonatal progressive ventricular dilatation: A single-centre experience. *Journal of Maternal-Fetal and Neonatal Medicine* 2015; 28:2273–9. <https://doi.org/10.3109/14767058.2013.796167> PMID: 23968309
